# Supplementary material for: Activation of Endothelial Large Conductance Potassium Channels Protects against TNF-α-Induced Inflammation
Source: MDPI journal article supplement (doi:10.3390/ijms24044087), 2023-02-17
Supplement: s1 [file s1]

# Supplemental Figure S1

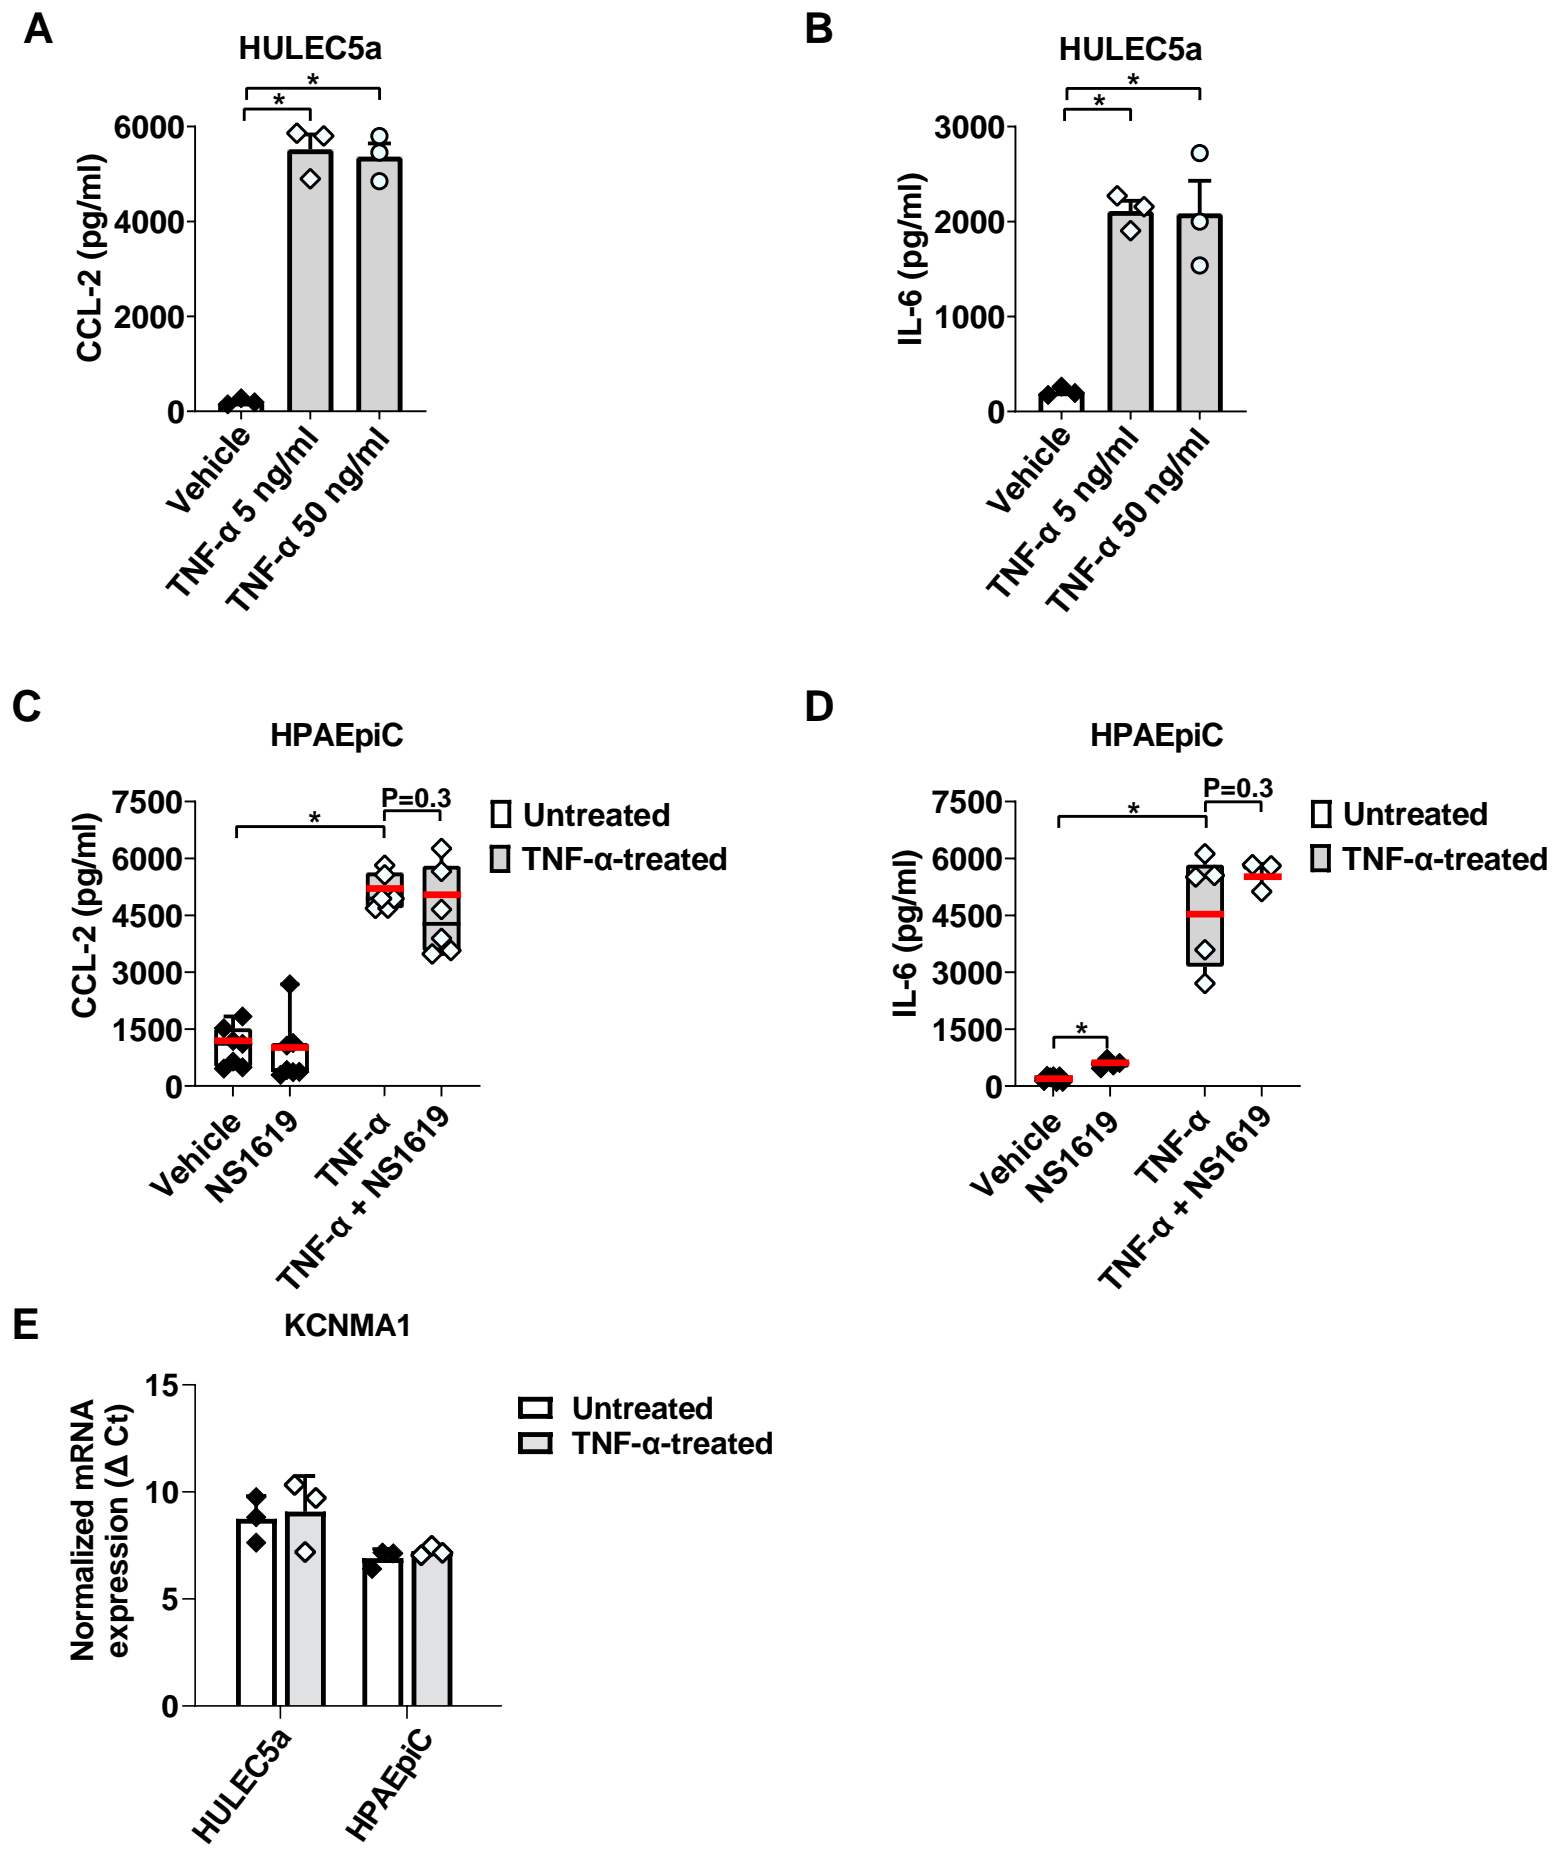

**Supplementary Figure S1.** (A,B) TNF- $\alpha$  dose-response experiments. Pilot ELISA experiments using HULEC5a cells reveal that 5 ng/mL and 50 ng/mL of TNF- $\alpha$  evoke a similar increase in CCL-2 and IL-6 levels. (C,D) TNF- $\alpha$  treatment (5 ng/mL; 24 h) also increases CCL-2 and IL-6 secretion from primary human alveolar epithelial cells (HPAEpiC), while BK activation with NS1619 has no effect on CCL-2 or IL-6 secretion from these cells ( $n = 3-11$ , \*  $p \leq 0.05$ ). Mean values are represented in red horizontal bars; black bars indicate medians. (E) RT-PCR results show that TNF- $\alpha$  treatment does not affect BK channel gene expression in either pulmonary microvascular endothelial (HULEC5a) or primary alveolar epithelial (HPAEpiC) cells ( $n = 3$ ). Bars represent mean values + SEM.  $n$  = number of separate cell passages, which are considered as biological replicates.
